# Supplementary material for: Insights into the Relationships Between Herbicide Activities, Molecular Structure and Membrane Interaction of Cinnamon and Citronella Essential Oils Components
Source: Int J Mol Sci. 2019 Aug 16;20(16):4007. doi: 10.3390/ijms20164007 (PMC6720526; doi:10.3390/ijms20164007)
Supplement: Supplementary file 1 [file ijms-20-04007-s001.pdf]

**Supplementary Materials:** Supplementary materials can be found at [www.mdpi.com/xxx/s1](http://www.mdpi.com/xxx/s1).

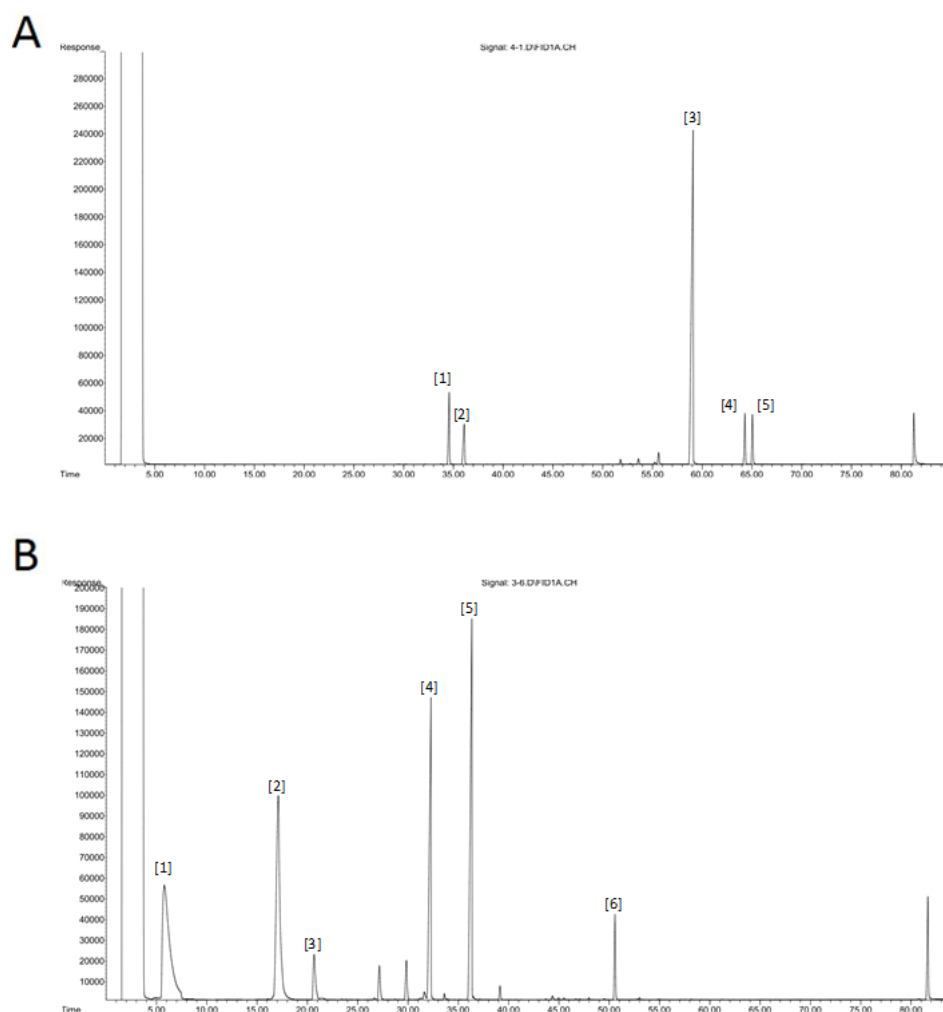

**Figure S1.** **A.** Chromatographic analysis of Cinnamon EO – [1] Caryophyllene, [2] Linalool, [3] Cinnamaldehyde, [4] Cinnamyl acetat, [5] Eugénol; **B.** Chromatographic analysis of Java citronella EO – [1] Limonene, [2] Citronellal, [3] Linalool, [4] Citronellol, [5] Géraniol, [6] Eugénol.

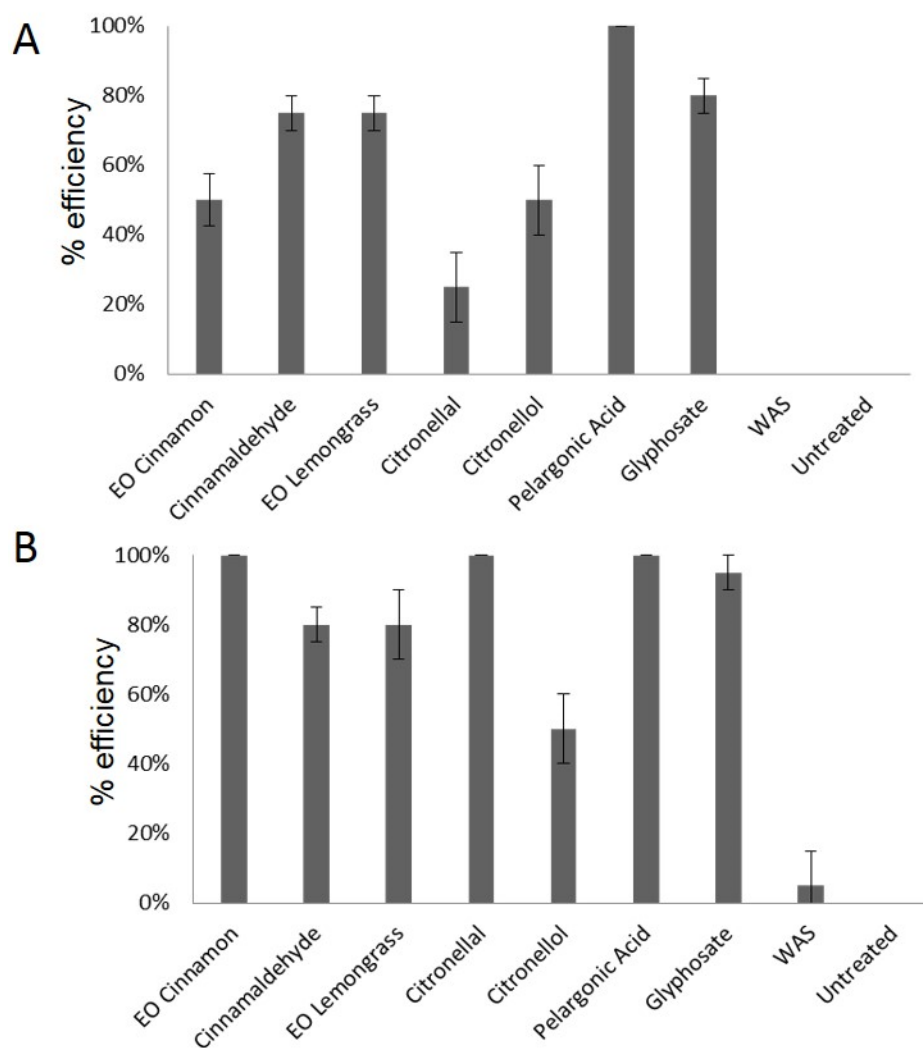

**Figure S2.** Herbicidal activity of cinnamon and Java citronella essential oils (3%) and their main components, CIN (2.15%), CitA (1.13%) and CitO (0.03%) respectively after 3 (**A**) and 7 (**B**) days. They are compared to glyphosate (0.72%) and pelargonic acid (3%) and to untreated plants or treated without active substance (WAS) (1% Tween 20 and 0.5 % ethanol) – ( $n = 5$ ).

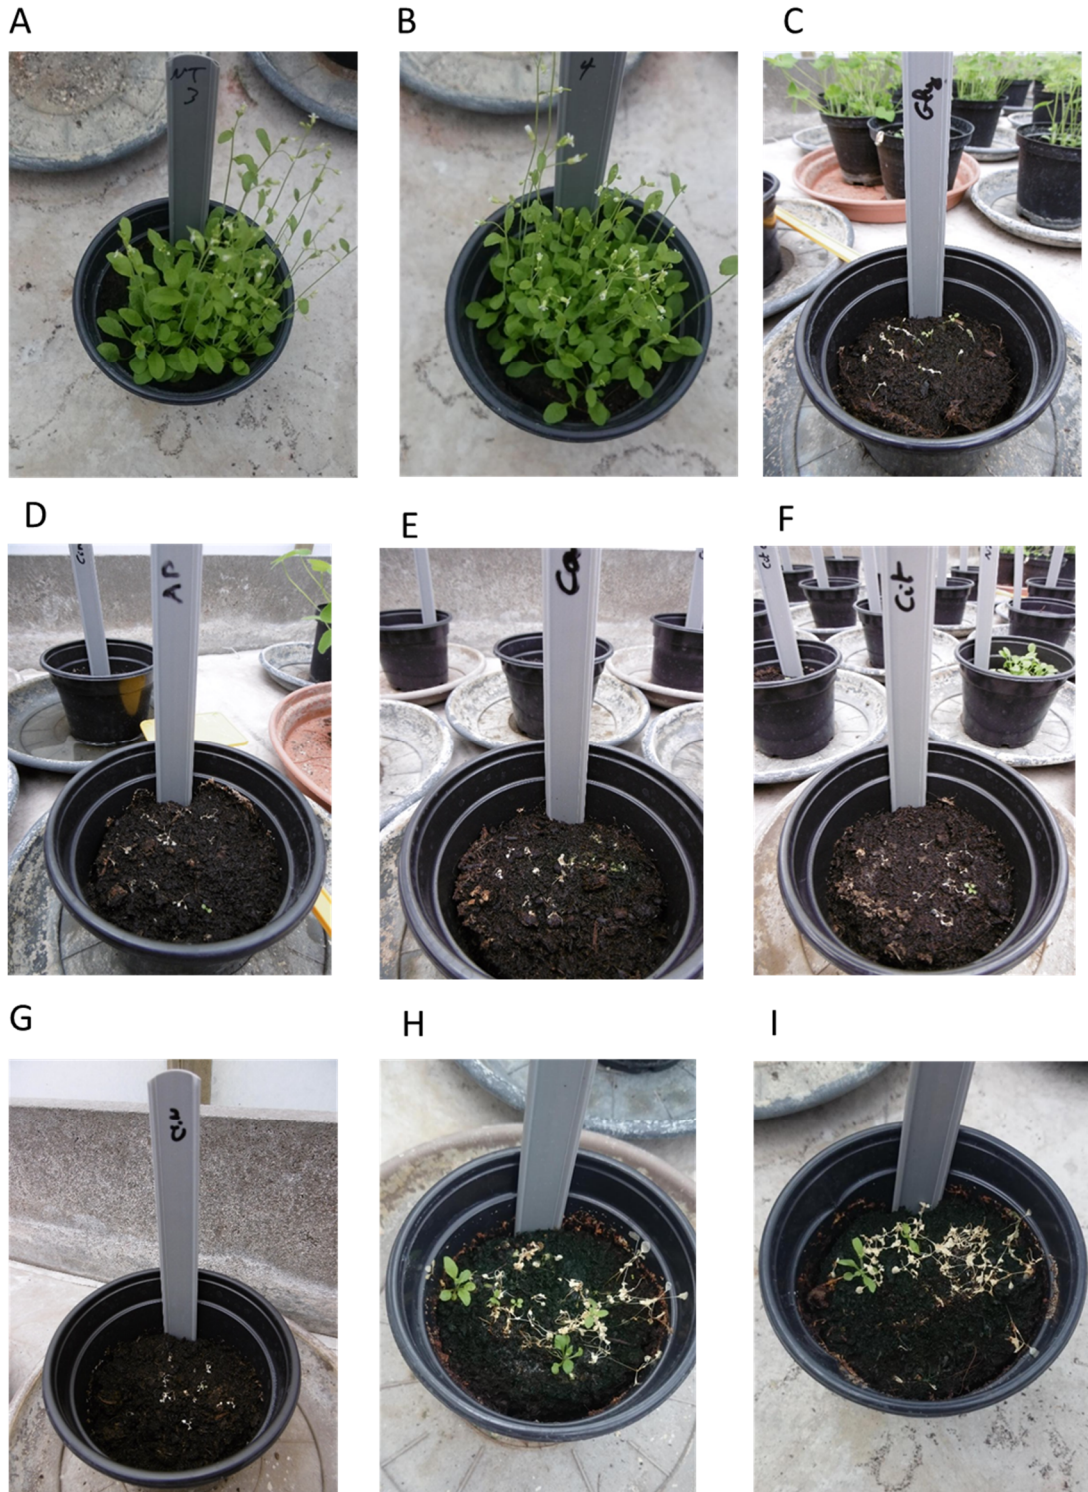

**Figure 3.** pictures of the application of the different products tested on *A. thaliana* leaves after seven days. **A.** Non treated plants; **B.** treated with no active substance; **C.** treated with glyphosate; **D.** treated with pelargonic acid; **E.** treated with cinnamon oil [3%]; **F.** treated with Java citronella oil [3%]; **G.** Treated with CIN [3%]; **H.** treated with CitA [3%]; **I.** treated with CitO [3%].

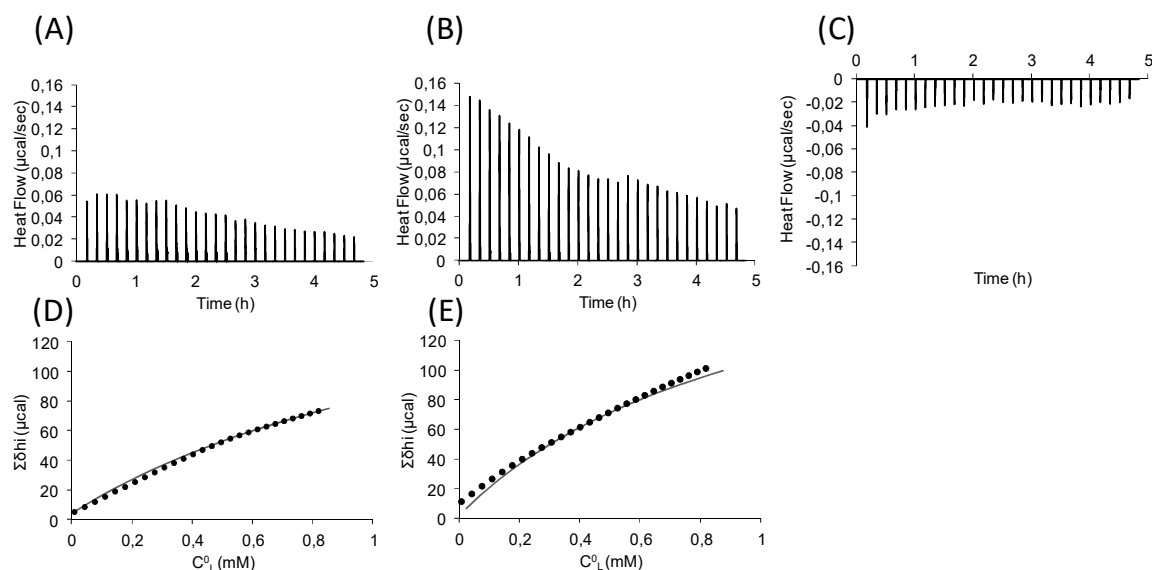

**Figure S4.** raw data from ITC experiments. Each peak corresponds to a single injection of 10 μL of PLPC/sitosterol LUV suspension at 5 mM into a solution at 132 μM of (A) CitA, (B) CitO and (C) CIN at 26 °C. LUV suspensions and EO individual molecule solution were buffered at pH 7.4 with Tris-HCl. Lower panel: cumulative heats of binding (ΣΔhi) as a function of lipid concentration in the measure cell (C<sup>o</sup><sub>L</sub>) (D) CitA and (E) CitO. No fitting has been carried out with CIN due to an absence of interaction.

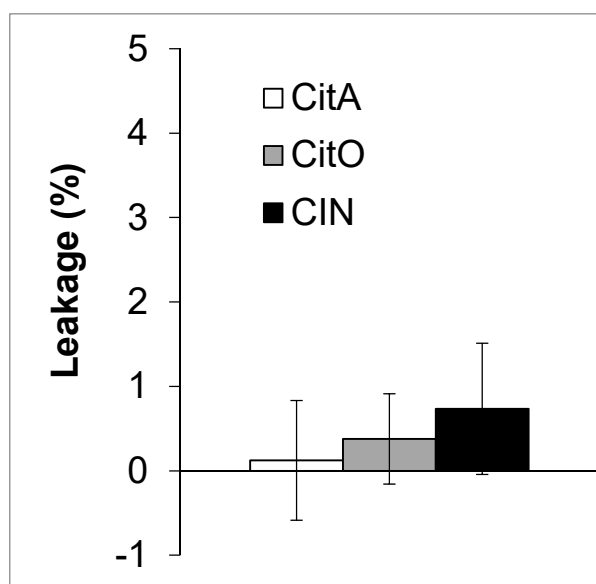

**Figure S5.** Mean relative HPTS release from PLPC/sitosterol (80/20) LUVs in the presence of CIN (black), CitA (white) or CitO (grey) for a molecule/lipid molar ratio of 1:1 after 15 minutes (the same ratio as obtained in the ITC experiment at the 4th injection). 100% is obtained after addition of Triton X100.

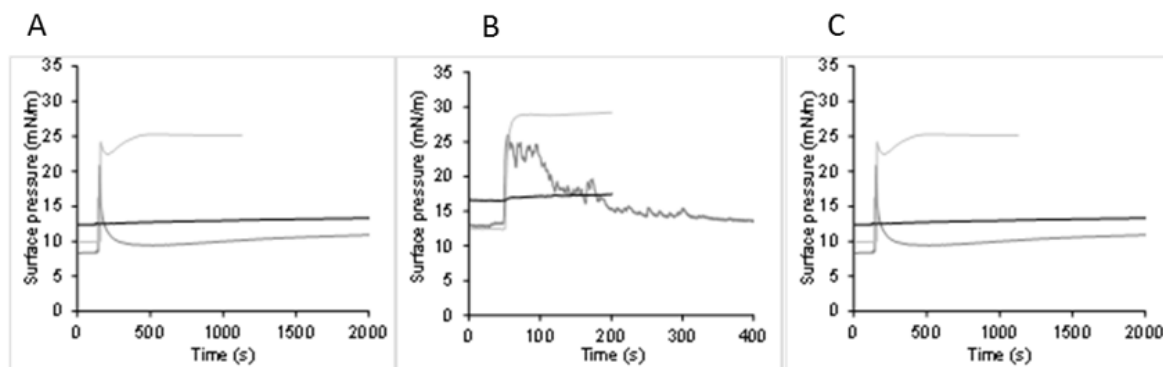

**Figure S6.** Adsorption of CitA (light grey), CitO (dark grey) and CIN (black) into a. (A) PLPC (B) sitosterol or (C) PLPC/sitosterol monolayer. Evolution of the surface pressure as a function of time for an initial surface pressure of the lipid monolayer between 8 and 18 mN/m.

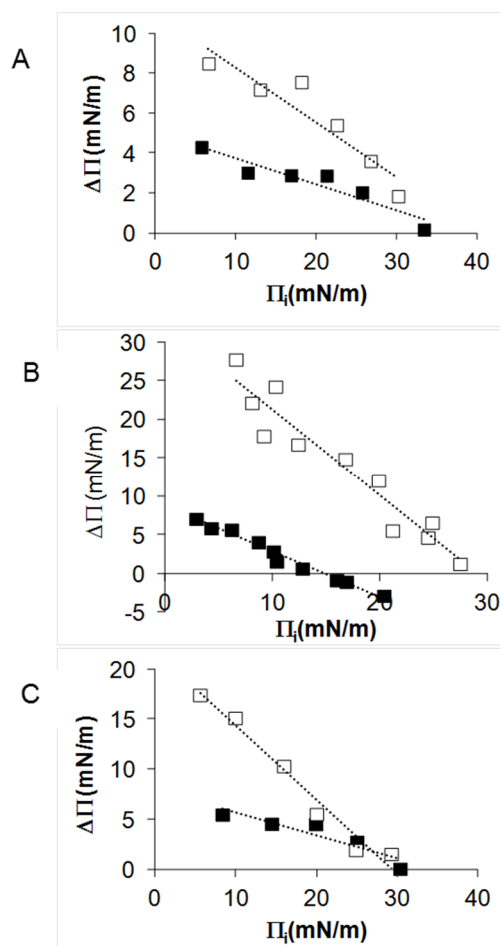

**Figure S7.** Surface pressure increase at equilibrium as a function of the initial surface pressure  $\Pi_i$  of the lipid monolayers induced by CitA (white squares) or CitO (black squares) adsorption. (A) PLPC, (B) Sitosterol, (C) PLPC/sitosterol (80/20) monolayer. Each point was obtained from an independent experiment.

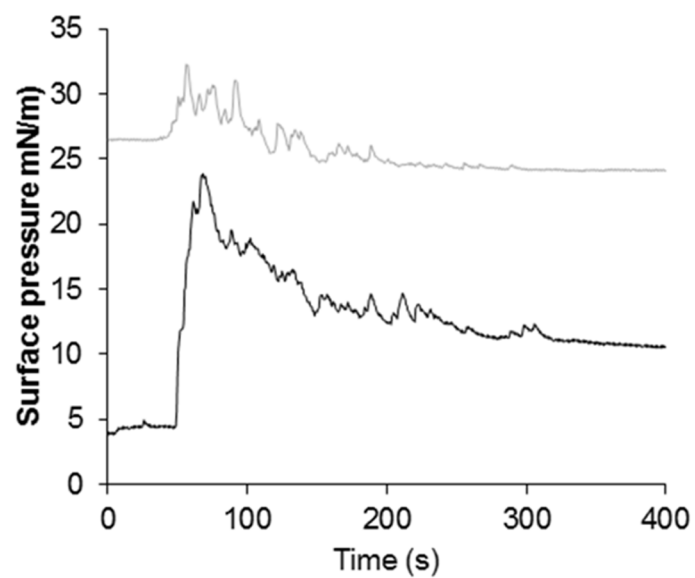

**Figure S8.** Adsorption of CitO into a  $\beta$ -sitosterol monolayer. Evolution of the surface pressure with time: in black at an initial surface pressure of 4 mN/m and in grey at an initial surface pressure of 26 mN/m.
